# Supplementary material for: Prenatal Phthalate Exposures and Childhood Fat Mass in a New York City Cohort
Source: PubMed Central journal article supplement (PMC4829985; doi:10.1289/ehp.1509788), 2015-08-25
Supplement: ehp.1509788.s001.acco.pdf [file ehp.1509788.s001.acco.pdf]

**Note to Readers:** *EHP* strives to ensure that all journal content is accessible to all readers. However, some figures and Supplemental Material published in *EHP* articles may not conform to 508 standards due to the complexity of the information being presented. If you need assistance accessing journal content, please contact [ehp508@niehs.nih.gov](mailto:ehp508@niehs.nih.gov). Our staff will work with you to assess and meet your accessibility needs within 3 working days.

## **Supplemental Material**

### **Prenatal Phthalate Exposures and Childhood Fat Mass in a New York City Cohort**

Jessie P. Buckley, Stephanie M. Engel, Michelle A. Mendez, David B. Richardson, Julie L. Daniels, Antonia M. Calafat, Mary S. Wolff, and Amy H. Herring

#### **Table of Contents**

**Figure S1.** Directed acyclic graph of associations between prenatal phthalate exposures, covariates, and child fat mass in the Mount Sinai Children's Environmental Health Study

**Table S1.** Age- and sex- standardized body mass index z-score distributions in the Mount Sinai Children's Environmental Health Study

**Table S2.** Adjusted associations between third trimester maternal urinary phthalate metabolite concentrations and percent fat mass among children aged 4 to 9 years in the Mount Sinai Children's Environmental Health Study

**Table S3.** Adjusted associations between third trimester maternal urinary phthalate metabolite concentrations and age- and sex- standardized body mass index z-scores among children aged 4 to 9 years in the Mount Sinai Children's Environmental Health Study

**Figure S1.** Directed acyclic graph of associations between prenatal phthalate exposures, covariates, and child fat mass in the Mount Sinai Children’s Environmental Health Study

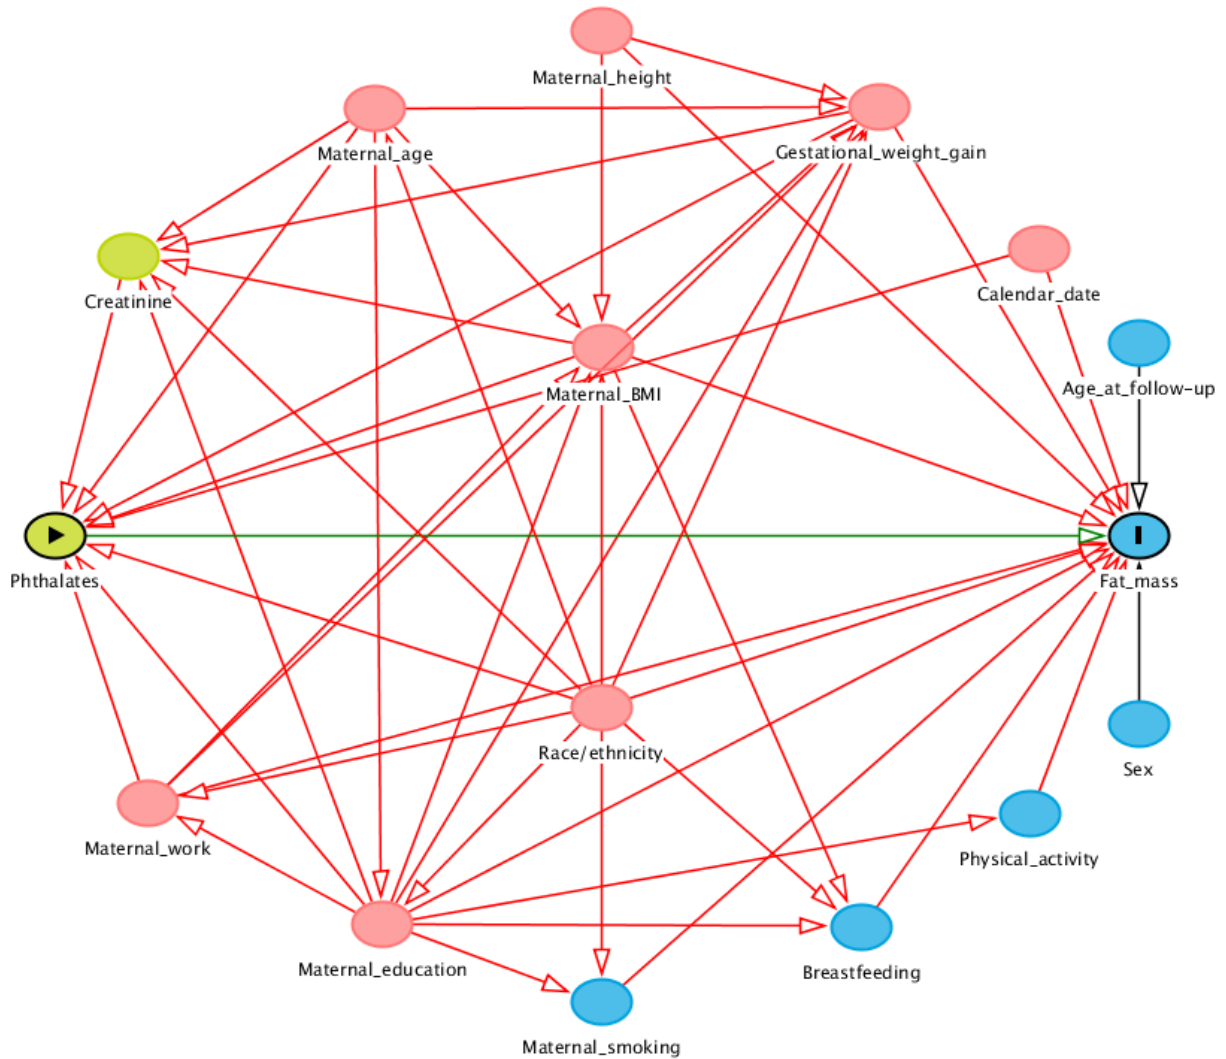

**Legend**

-  exposure
-  outcome
-  ancestor of exposure
-  ancestor of outcome
-  ancestor of exposure *and* outcome

**Table S1.** Age- and sex- standardized body mass index z-score distributions in the Mount Sinai Children’s Environmental Health Study

| Visit      | Mean age<br>(years) $\pm$ SD | Overall |                 | Girls |                 | Boys |                 |
|------------|------------------------------|---------|-----------------|-------|-----------------|------|-----------------|
|            |                              | n       | Mean $\pm$ SD   | n     | Mean $\pm$ SD   | n    | Mean $\pm$ SD   |
| All visits | 6.5 $\pm$ 1.3                | 364     | 0.56 $\pm$ 1.15 | 174   | 0.50 $\pm$ 1.10 | 190  | 0.62 $\pm$ 1.20 |
| Visit 1    | 4.9 $\pm$ 0.4                | 99      | 0.51 $\pm$ 1.18 | 49    | 0.51 $\pm$ 1.07 | 50   | 0.52 $\pm$ 1.29 |
| Visit 2    | 6.1 $\pm$ 0.2                | 117     | 0.50 $\pm$ 1.04 | 57    | 0.41 $\pm$ 1.04 | 60   | 0.59 $\pm$ 1.05 |
| Visit 3    | 7.8 $\pm$ 0.8                | 148     | 0.63 $\pm$ 1.21 | 68    | 0.57 $\pm$ 1.17 | 80   | 0.69 $\pm$ 1.25 |

Standard deviation (SD)

**Table S2.** Adjusted associations between third trimester maternal urinary phthalate metabolite concentrations and percent fat mass among children aged 4 to 9 years in the Mount Sinai Children’s Environmental Health Study

| Metabolite    | Exposure metric | Exposure unit <sup>a</sup> | Overall               |                               | Girls                 |                               | Boys <sup>d</sup>     |                               |
|---------------|-----------------|----------------------------|-----------------------|-------------------------------|-----------------------|-------------------------------|-----------------------|-------------------------------|
|               |                 |                            | <i>n</i> <sup>b</sup> | $\beta$ (95% CI) <sup>c</sup> | <i>n</i> <sup>b</sup> | $\beta$ (95% CI) <sup>c</sup> | <i>n</i> <sup>b</sup> | $\beta$ (95% CI) <sup>c</sup> |
| MEP           | Lowest tertile  | <186                       | 126                   | ref                           | 47                    | ref                           | 75                    | ref                           |
|               | Middle tertile  | 186–546                    | 116                   | -0.75 (-3.45, 1.95)           | 56                    | -1.66 (-4.95, 1.69)           | 64                    | -0.20 (-3.81, 3.43)           |
|               | Highest tertile | >546                       | 121                   | 0.69 (-2.15, 3.53)            | 70                    | -0.38 (-3.77, 3.04)           | 51                    | 2.46 (-1.49, 6.36)            |
|               | Continuous      | SD                         | 363                   | 0.12 (-1.34, 1.58)            | 173                   | -0.35 (-2.43, 1.75)           | 190                   | 0.75 (-1.31, 2.80)            |
| MnBP          | Lowest tertile  | <32.0                      | 132                   | ref                           | 49                    | ref                           | 77                    | ref                           |
|               | Middle tertile  | 32.0–64.6                  | 106                   | -0.69 (-3.66, 2.27)           | 55                    | 1.00 (-2.64, 4.60)            | 61                    | -1.80 (-5.68, 2.10)           |
|               | Highest tertile | >64.6                      | 125                   | -1.27 (-4.69, 2.16)           | 69                    | -0.43 (-4.37, 3.49)           | 52                    | -1.71 (-6.19, 2.82)           |
|               | Continuous      | SD                         | 363                   | -0.86 (-3.07, 1.36)           | 173                   | -0.34 (-3.71, 3.05)           | 190                   | -0.86 (-3.46, 1.74)           |
| MiBP          | Lowest tertile  | <6.0                       | 122                   | ref                           | 39                    | ref                           | 93                    | ref                           |
|               | Middle tertile  | 6.0–12.2                   | 120                   | 0.46 (-2.30, 3.20)            | 61                    | 0.55 (-2.94, 4.02)            | 45                    | 0.71 (-2.93, 4.32)            |
|               | Highest tertile | >12.2                      | 121                   | 0.57 (-2.63, 3.79)            | 73                    | 1.01 (-2.67, 4.69)            | 52                    | -0.07 (-4.44, 4.32)           |
|               | Continuous      | SD                         | 363                   | 0.34 (-1.54, 2.20)            | 173                   | 1.04 (-1.36, 3.44)            | 190                   | -0.88 (-3.44, 1.68)           |
| MCPP          | Lowest tertile  | <2.8                       | 131                   | ref                           | 49                    | ref                           | 79                    | ref                           |
|               | Middle tertile  | 2.8-6.2                    | 111                   | -0.61 (-3.48, 2.24)           | 74                    | -0.50 (-3.87, 2.90)           | 52                    | -0.72 (-4.60, 3.18)           |
|               | Highest tertile | >6.2                       | 121                   | 1.79 (-1.61, 5.17)            | 50                    | 2.06 (-1.78, 5.88)            | 59                    | 1.64 (-2.98, 6.32)            |
|               | Continuous      | SD                         | 363                   | 0.63 (-1.55, 2.82)            | 173                   | 1.21 (-1.44, 3.87)            | 190                   | -0.08 (-3.22, 3.03)           |
| MBzP          | Lowest tertile  | <12.7                      | 128                   | ref                           | 52                    | ref                           | 79                    | ref                           |
|               | Middle tertile  | 12.7–30.5                  | 126                   | -0.93 (-3.65, 1.77)           | 57                    | -2.19 (-5.70, 1.34)           | 54                    | -0.72 (-4.35, 2.92)           |
|               | Highest tertile | >30.5                      | 109                   | 0.84 (-2.29, 4.01)            | 64                    | 1.63 (-1.89, 5.20)            | 57                    | -0.79 (-5.28, 3.74)           |
|               | Continuous      | SD                         | 363                   | 0.67 (-1.31, 2.65)            | 173                   | 0.62 (-1.77, 3.02)            | 190                   | 0.98 (-2.17, 4.14)            |
| $\Sigma$ DEHP | Lowest tertile  | <0.23                      | 120                   | ref                           | 44                    | ref                           | 76                    | ref                           |
|               | Middle tertile  | 0.23–0.60                  | 120                   | -1.77 (-4.48, 0.97)           | 61                    | -1.53 (-4.96, 1.88)           | 59                    | -1.79 (-5.34, 1.75)           |
|               | Highest tertile | >0.60                      | 123                   | -3.06 (-5.99, -0.09)          | 68                    | -3.07 (-6.54, 0.41)           | 55                    | -2.99 (-7.10, 1.15)           |
|               | Continuous      | SD                         | 363                   | -0.89 (-2.24, 0.47)           | 173                   | -0.80 (-2.81, 1.23)           | 190                   | -0.64 (-2.46, 1.16)           |

Referent category (ref), standard deviation (SD)

<sup>a</sup> Tertile cut points are expressed as micrograms per gram creatinine (or micromoles per gram creatinine for  $\Sigma$ DEHP).

<sup>b</sup> Number of follow-up visits.

<sup>c</sup> Beta coefficients (95% credible intervals) were estimated in multiple metabolite linear mixed effects regression models adjusted for urine collection date; maternal race/ethnicity, age, education, work status, and smoking during pregnancy; maternal height and pre-pregnancy body mass index; adequacy of gestational weight gain; breastfeeding; months of age and physical activity at follow-up; and, for overall models, child's sex. Models of continuous metabolite concentrations were adjusted for natural log creatinine. Sex-specific estimates were estimated in models including a product term between child's sex and each metabolite or  $\Sigma$ DEHP.

<sup>d</sup> Sex-specific estimates did not meet criteria for heterogeneity (i.e., 80% credible intervals for all phthalate\*sex product terms included the null value).

**Table S3.** Adjusted associations between third trimester maternal urinary phthalate metabolite concentrations and age- and sex-standardized body mass index z-scores among children aged 4 to 9 years in the Mount Sinai Children’s Environmental Health Study

| Metabolite    | Exposure metric | Exposure unit <sup>a</sup> | Overall               |                               | Girls                 |                                 | Boys                  |                                  |
|---------------|-----------------|----------------------------|-----------------------|-------------------------------|-----------------------|---------------------------------|-----------------------|----------------------------------|
|               |                 |                            | <i>n</i> <sup>b</sup> | $\beta$ (95% CI) <sup>c</sup> | <i>n</i> <sup>b</sup> | $\beta$ (95% CI) <sup>c</sup>   | <i>n</i> <sup>b</sup> | $\beta$ (95% CI) <sup>c</sup>    |
| MEP           | Lowest tertile  | <186                       | 126                   | ref                           | 47                    | ref                             | 75                    | ref                              |
|               | Middle tertile  | 186–546                    | 116                   | 0.16 (-0.23, 0.55)            | 57                    | -0.02 (-0.48, 0.44)             | 64                    | 0.34 (-0.18, 0.87)               |
|               | Highest tertile | >546                       | 122                   | 0.17 (-0.24, 0.58)            | 70                    | 0.13 (-0.35, 0.61)              | 51                    | 0.23 (-0.33, 0.79)               |
|               | Continuous      | SD                         | 364                   | 0.05 (-0.16, 0.27)            | 174                   | 0.02 (-0.28, 0.33)              | 190                   | 0.15 (-0.15, 0.45)               |
| MnBP          | Lowest tertile  | <32.0                      | 131                   | ref                           | 49                    | ref                             | 77                    | ref                              |
|               | Middle tertile  | 32.0–64.6                  | 108                   | -0.17 (-0.59, 0.25)           | 55                    | 0.07 (-0.43, 0.57) <sup>d</sup> | 61                    | -0.41 (-0.96, 0.15) <sup>d</sup> |
|               | Highest tertile | >64.6                      | 125                   | -0.19 (-0.67, 0.30)           | 70                    | -0.16 (-0.69, 0.38)             | 52                    | -0.25 (-0.90, 0.39)              |
|               | Continuous      | SD                         | 364                   | -0.13 (-0.45, 0.19)           | 174                   | -0.10 (-0.57, 0.37)             | 190                   | -0.15 (-0.53, 0.23)              |
| MiBP          | Lowest tertile  | <6.0                       | 122                   | ref                           | 38                    | ref                             | 93                    | ref                              |
|               | Middle tertile  | 6.0–12.2                   | 121                   | 0.10 (-0.30, 0.50)            | 63                    | 0.16 (-0.33, 0.65)              | 45                    | 0.05 (-0.47, 0.57)               |
|               | Highest tertile | >12.2                      | 121                   | 0.03 (-0.42, 0.49)            | 73                    | 0.06 (-0.44, 0.57)              | 52                    | -0.05 (-0.68, 0.58)              |
|               | Continuous      | SD                         | 364                   | -0.02 (-0.29, 0.25)           | 174                   | 0.04 (-0.30, 0.38)              | 190                   | -0.13 (-0.51, 0.24)              |
| MCP           | Lowest tertile  | <2.8                       | 131                   | ref                           | 49                    | ref                             | 79                    | ref                              |
|               | Middle tertile  | 2.8-6.2                    | 112                   | 0.11 (-0.31, 0.52)            | 74                    | 0.11 (-0.37, 0.59)              | 52                    | 0.19 (-0.37, 0.74)               |
|               | Highest tertile | >6.2                       | 121                   | 0.32 (-0.16, 0.79)            | 51                    | 0.35 (-0.18, 0.87)              | 59                    | 0.40 (-0.26, 1.05)               |
|               | Continuous      | SD                         | 364                   | 0.14 (-0.17, 0.46)            | 174                   | 0.16 (-0.22, 0.54)              | 190                   | 0.16 (-0.29, 0.61)               |
| MBzP          | Lowest tertile  | <12.7                      | 128                   | ref                           | 52                    | ref                             | 79                    | ref                              |
|               | Middle tertile  | 12.7–30.5                  | 126                   | -0.18 (-0.56, 0.22)           | 58                    | -0.23 (-0.72, 0.26)             | 54                    | -0.23 (-0.75, 0.29)              |
|               | Highest tertile | >30.5                      | 110                   | -0.20 (-0.65, 0.25)           | 64                    | -0.06 (-0.56, 0.44)             | 57                    | -0.38 (-1.02, 0.26)              |
|               | Continuous      | SD                         | 364                   | -0.02 (-0.32, 0.27)           | 174                   | 0.03 (-0.33, 0.38)              | 190                   | -0.11 (-0.56, 0.34)              |
| $\Sigma$ DEHP | Lowest tertile  | <0.23                      | 120                   | ref                           | 44                    | ref                             | 76                    | ref                              |
|               | Middle tertile  | 0.23–0.60                  | 120                   | -0.10 (-0.49, 0.29)           | 61                    | -0.17 (-0.65, 0.30)             | 59                    | 0.01 (-0.50, 0.52)               |
|               | Highest tertile | >0.60                      | 124                   | -0.13 (-0.55, 0.29)           | 69                    | -0.13 (-0.60, 0.35)             | 55                    | -0.08 (-0.66, 0.51)              |
|               | Continuous      | SD                         | 364                   | -0.05 (-0.25, 0.15)           | 174                   | -0.05 (-0.34, 0.24)             | 190                   | -0.01 (-0.28, 0.26)              |

Referent category (ref), standard deviation (SD)

<sup>a</sup> Tertile cut points are expressed as micrograms per gram creatinine (or micromoles per gram creatinine for  $\Sigma$ DEHP).

<sup>b</sup> Number of follow-up visits.

<sup>c</sup> Beta coefficients (95% credible intervals) were estimated in multiple metabolite linear mixed effects regression models adjusted for urine collection date; maternal race/ethnicity, age, education, work status, and smoking during pregnancy; maternal height and pre-pregnancy body mass index; adequacy of gestational weight gain; breastfeeding; months of age and physical activity at follow-up; and, for overall models, child's sex. Models of continuous metabolite concentrations were adjusted for natural log creatinine. Sex-specific estimates were estimated in models including a product term between child's sex and each metabolite or  $\Sigma$ DEHP.

<sup>d</sup> Sex-specific estimates met criteria for heterogeneity (i.e., 80% credible interval for phthalate\*sex product term excluded the null value).
